# Supplementary material
Source: MDPI journal article supplement (https://www.mdpi.com/2072-4292/9/2/179)
Supplement: s1 [file s1]

# Supplementary Materials: Leveraging Multi-Sensor Time Series Datasets to Map Short- and Long-Term Tropical Forest Disturbances in the Colombian Andes

Paulo J. Murillo-Sandoval <sup>1,2</sup>, Jamon Van Den Hoek<sup>3</sup> and Thomas Hilker<sup>1</sup>

**Table S1.** Total number of Landsat images used for disturbance detection.

| Year  | Landsat 5 | Landsat 7 | Landsat 8 | Total |
|-------|-----------|-----------|-----------|-------|
| 1996  | 2         |           |           | 2     |
| 1997  | 4         |           |           | 4     |
| 1998  | 8         |           |           | 8     |
| 1999  | 7         | 2         |           | 9     |
| 2000  | 2         | 7         |           | 9     |
| 2001  |           | 6         |           | 6     |
| 2002  |           | 6         |           | 6     |
| 2003  |           | 1         |           | 1     |
| 2004  |           | 8         |           | 8     |
| 2005  |           | 6         |           | 6     |
| 2006  |           | 5         |           | 5     |
| 2007  | 1         | 8         |           | 9     |
| 2008  |           | 7         |           | 7     |
| 2009  |           | 10        |           | 10    |
| 2010  | 1         | 9         |           | 10    |
| 2011  | 1         | 7         |           | 8     |
| 2012  |           | 10        |           | 10    |
| 2013  |           | 9         | 1         | 10    |
| 2014  |           | 4         | 9         | 13    |
| 2015  |           |           | 8         | 8     |
| Total | 26        | 105       | 18        | 149   |

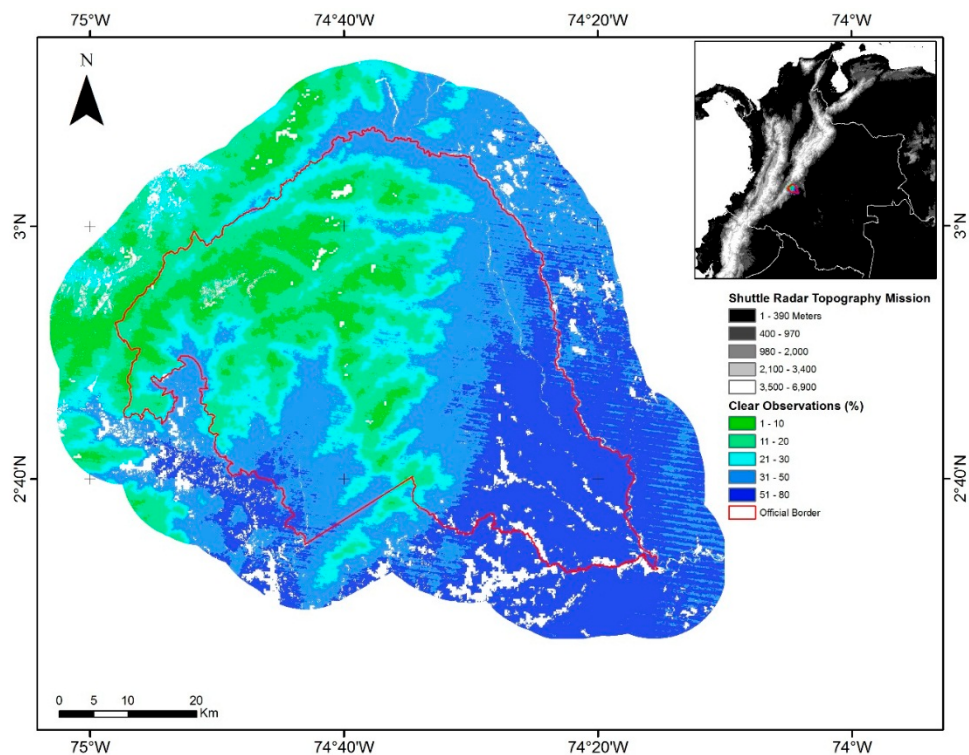

**Figure S1.** Percentage of cloud-free Landsat observation in the period 1996–2015.

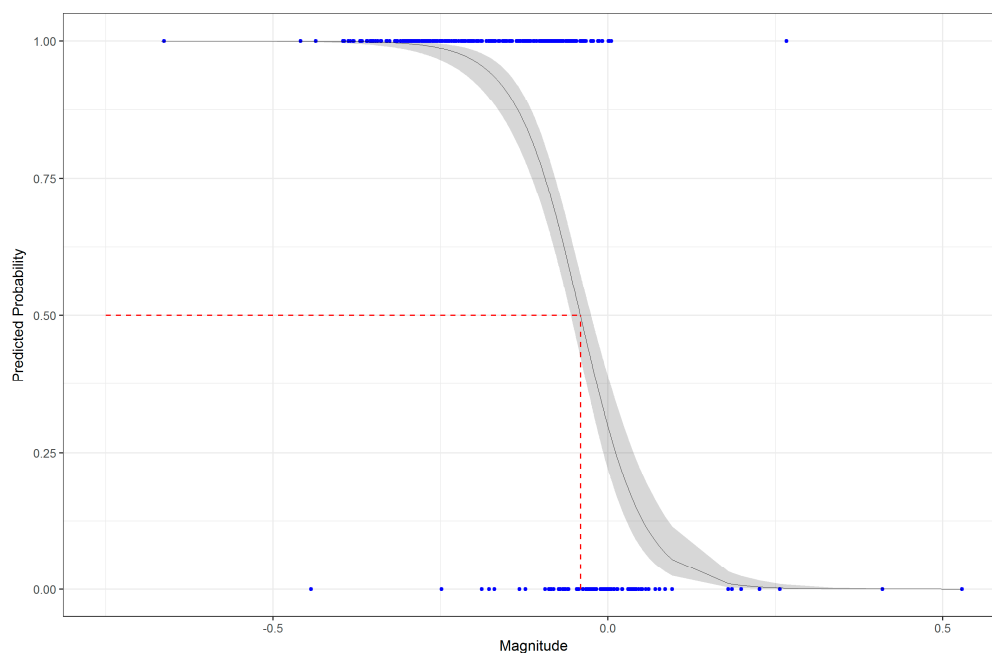

**Figure S2.** Selection of magnitude threshold ( $P(\text{disturbances}) = 0.5$ ) using Binomial Logistic Regression. The grey area is 95% confident interval. Training sites (blue points) were selected based on visual interpretation where 0 = non-disturbed and 1 = disturbed.

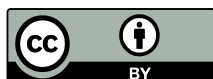

© 2017 by the authors; licensee MDPI, Basel, Switzerland. This article is an open access article distributed under the terms and conditions of the Creative Commons by Attribution (CC-BY) license (<http://creativecommons.org/licenses/by/4.0/>).
